# Supplementary material
Source: HighWire-hosted journal article supplement (doi:10.1101/rna.052829.115)

Figure S1

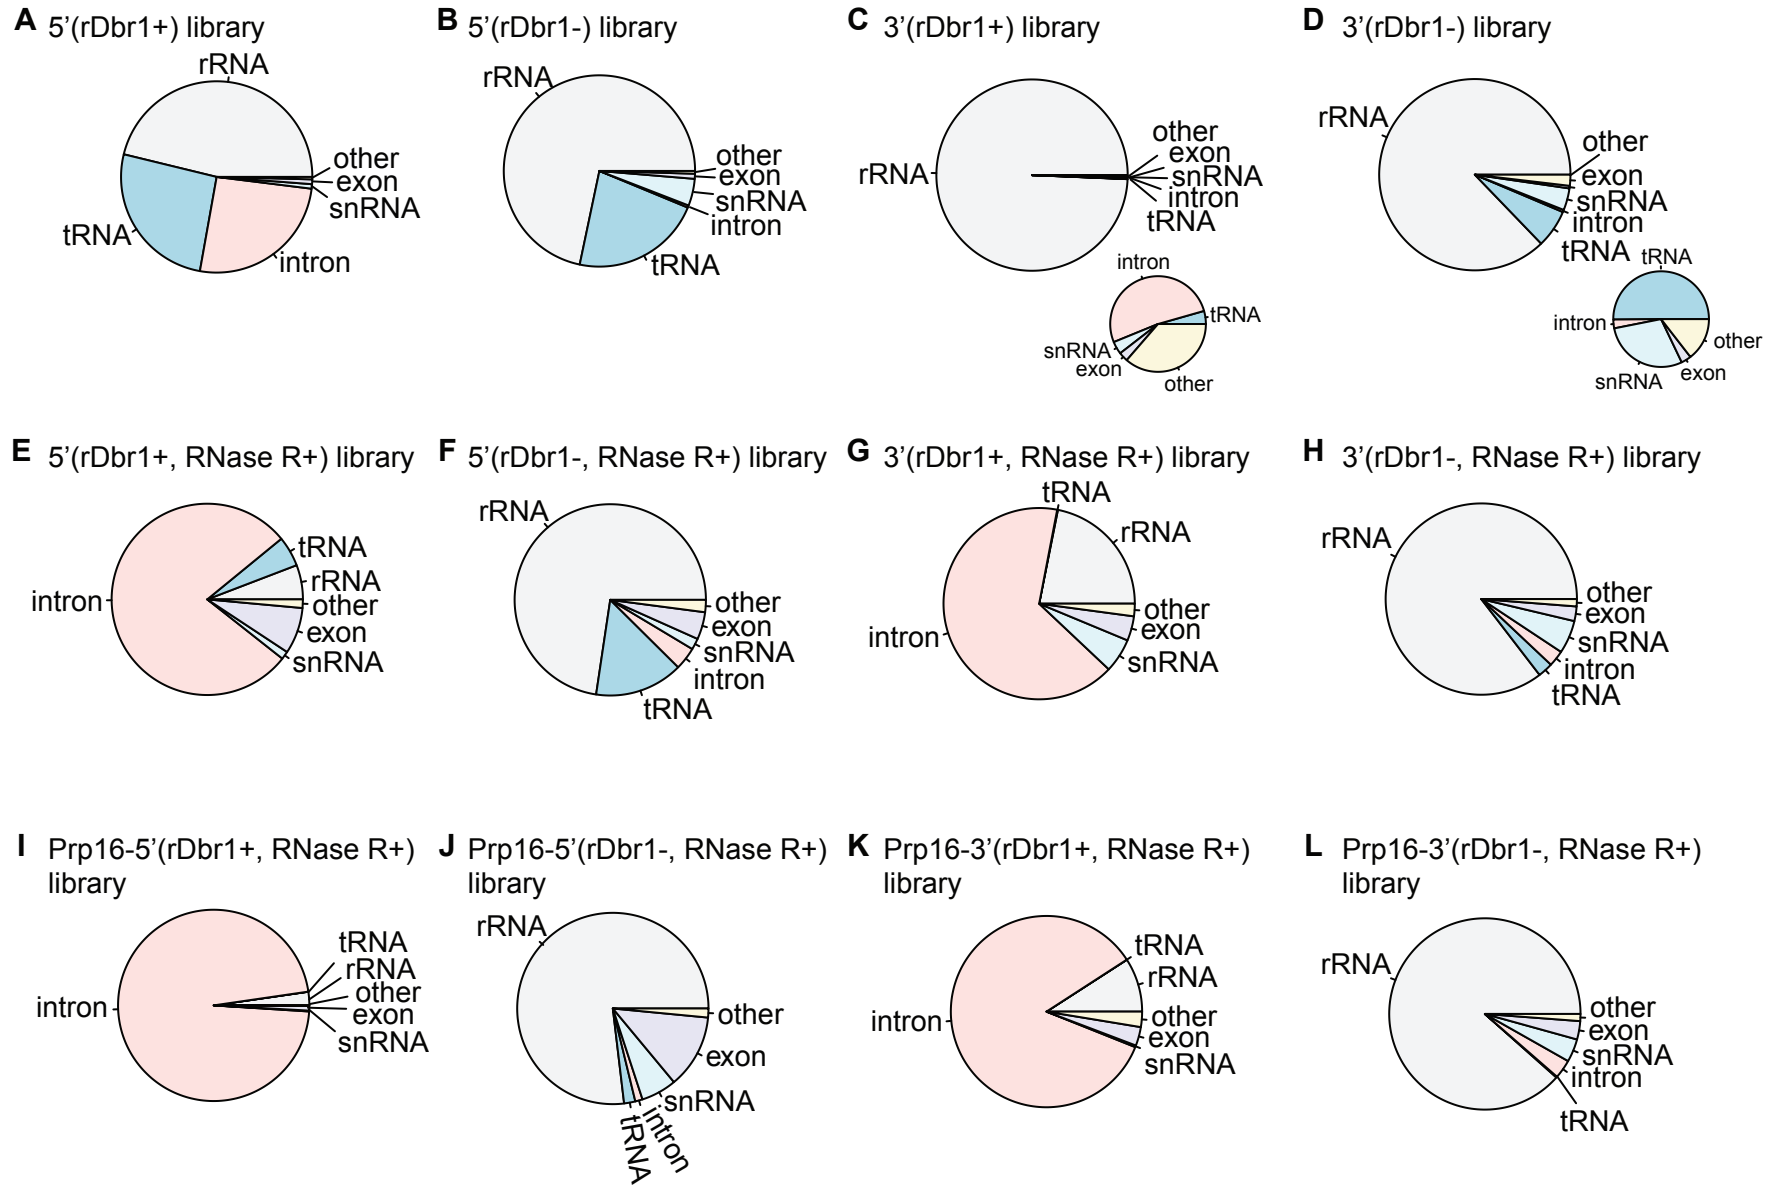

Figure S2

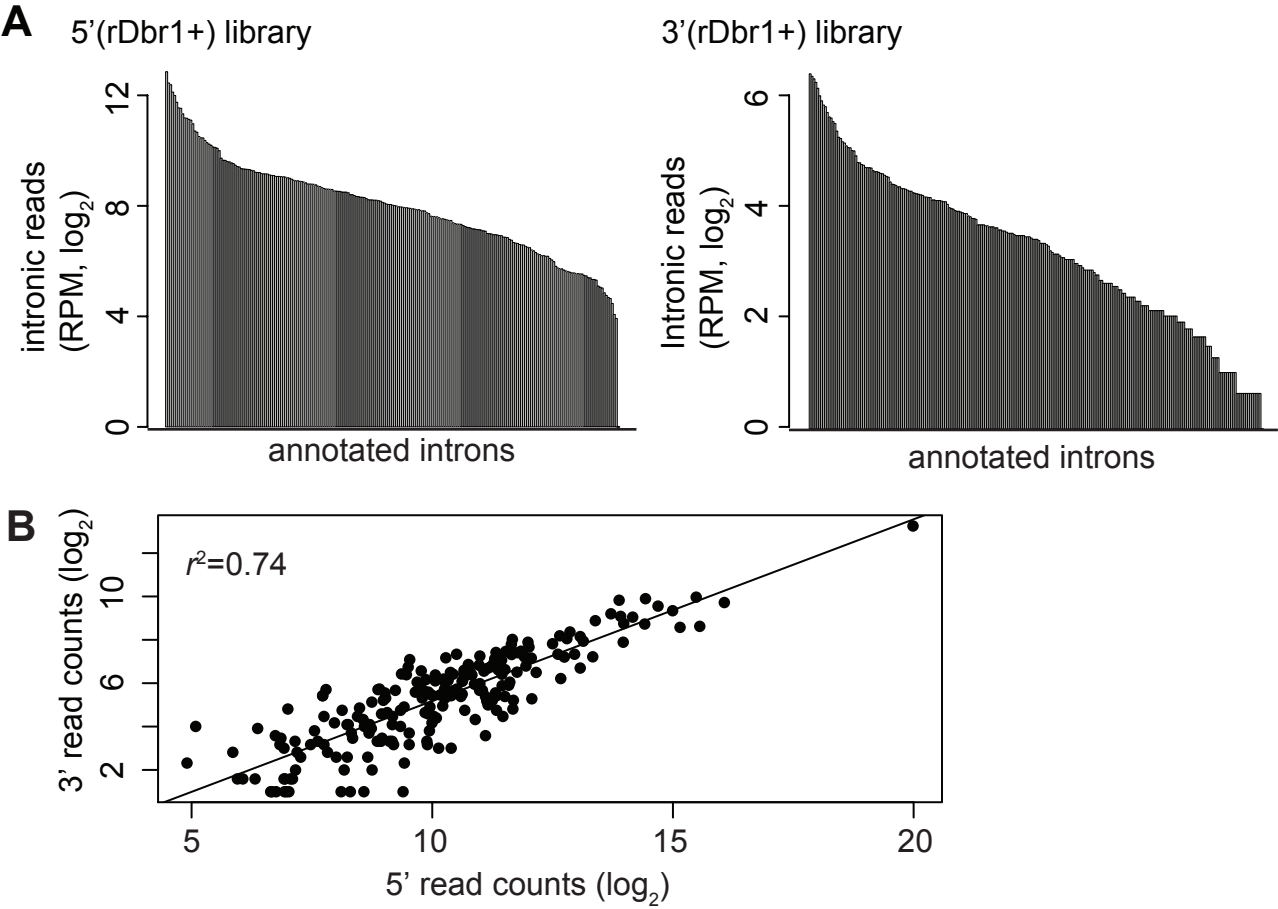

Figure S3

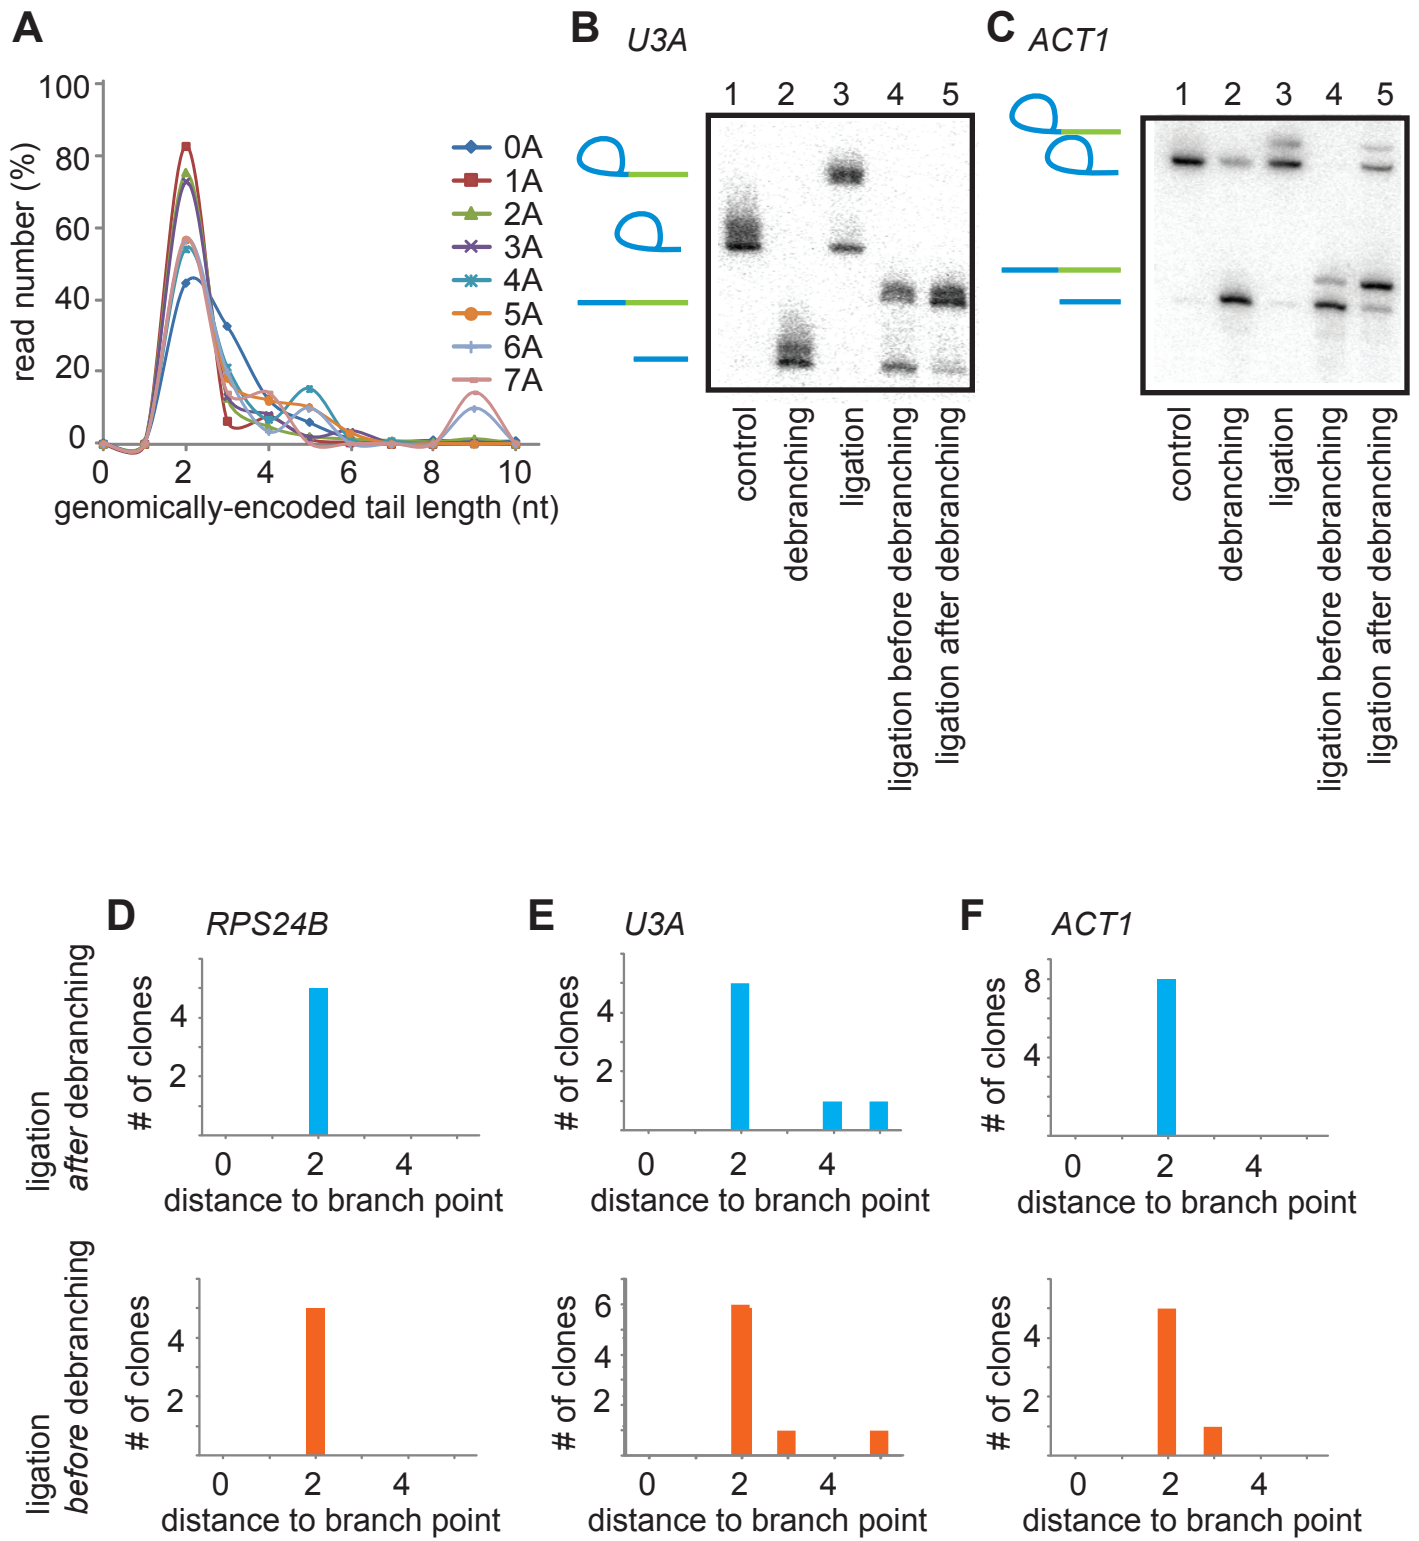

Figure S4

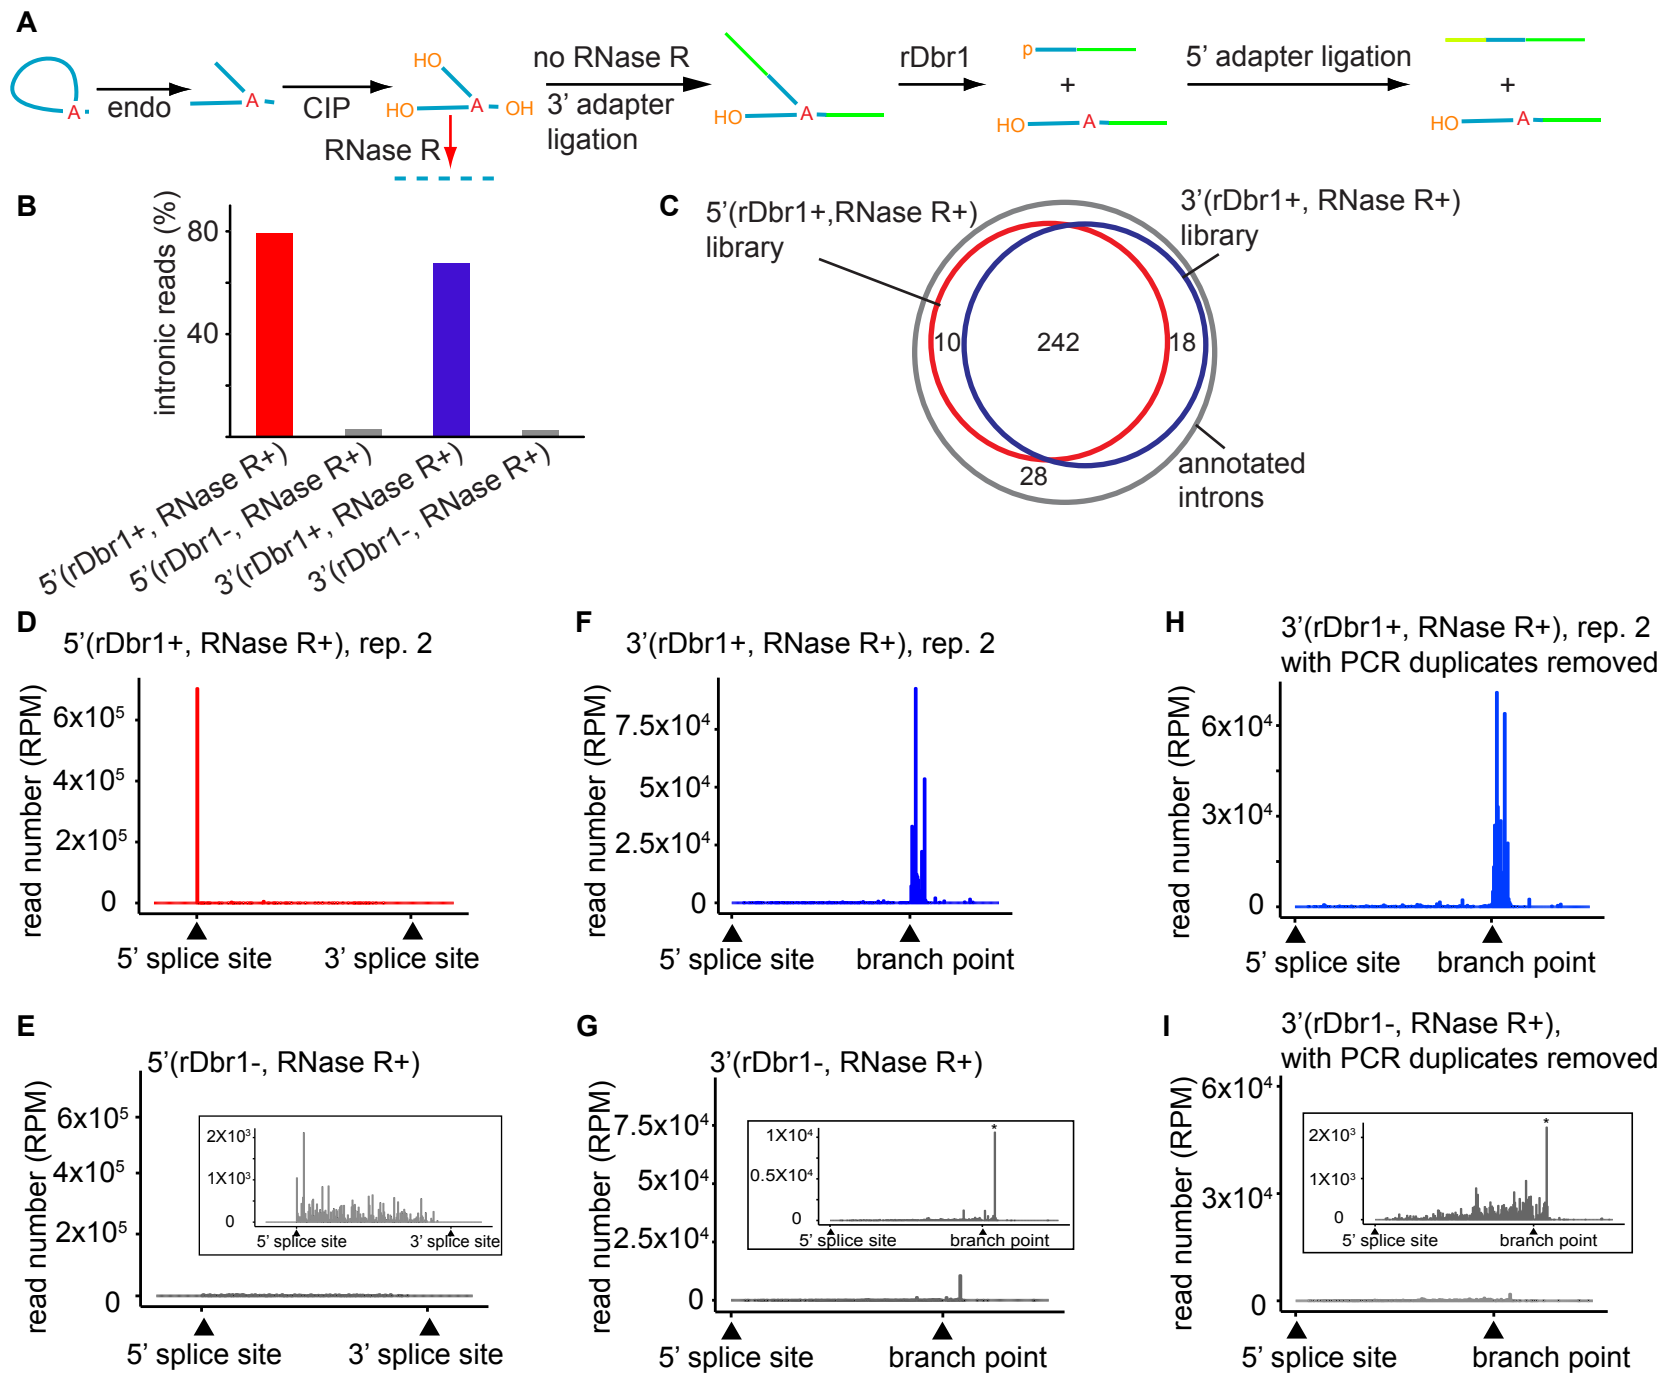

Figure S5

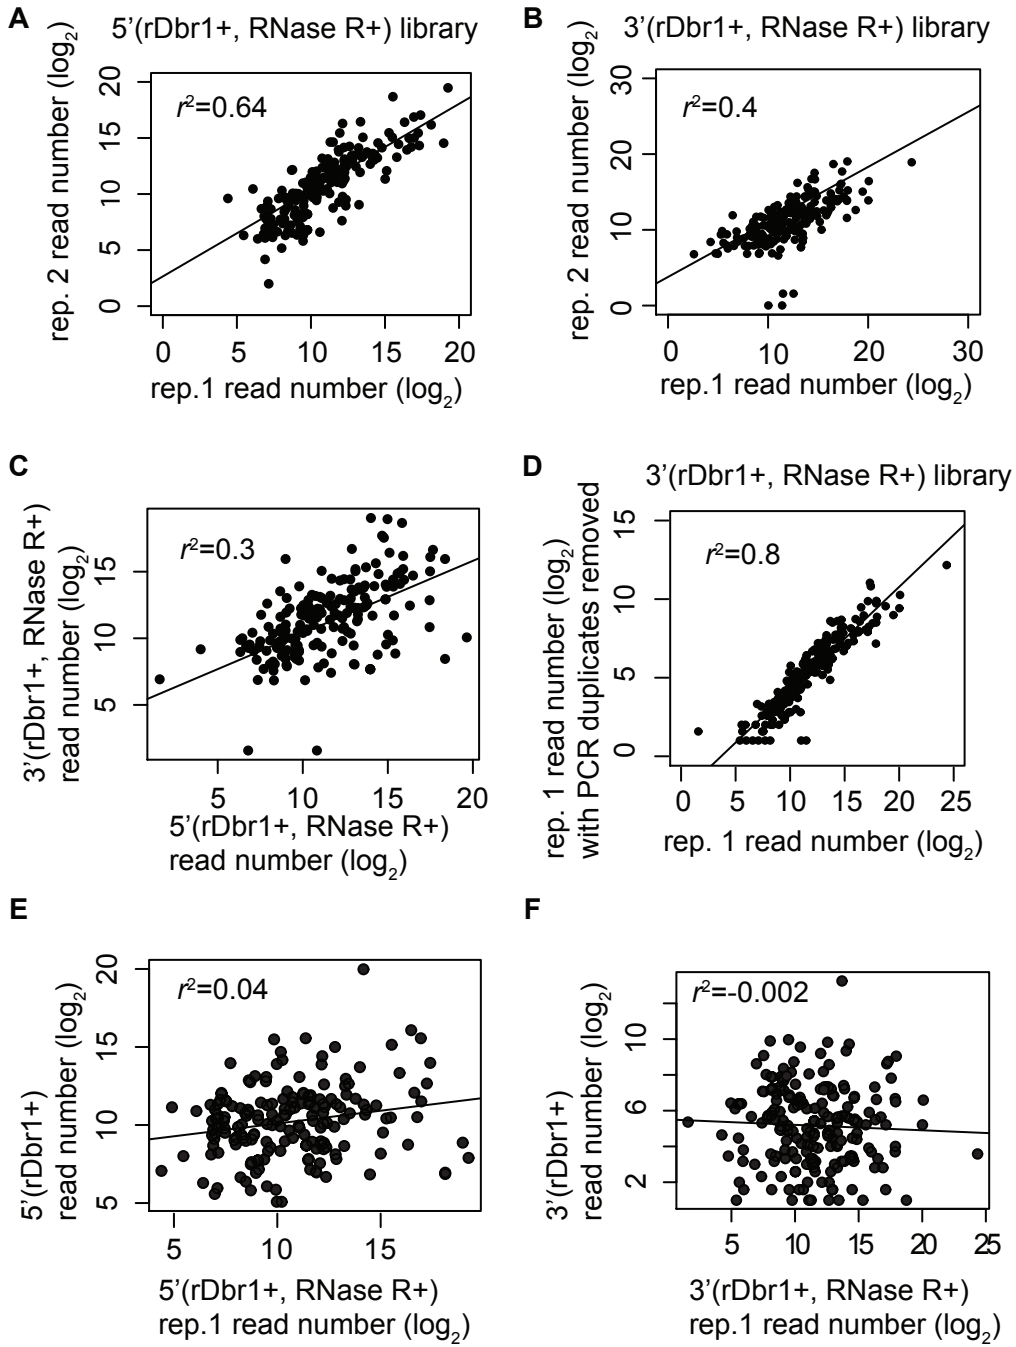

Figure S6

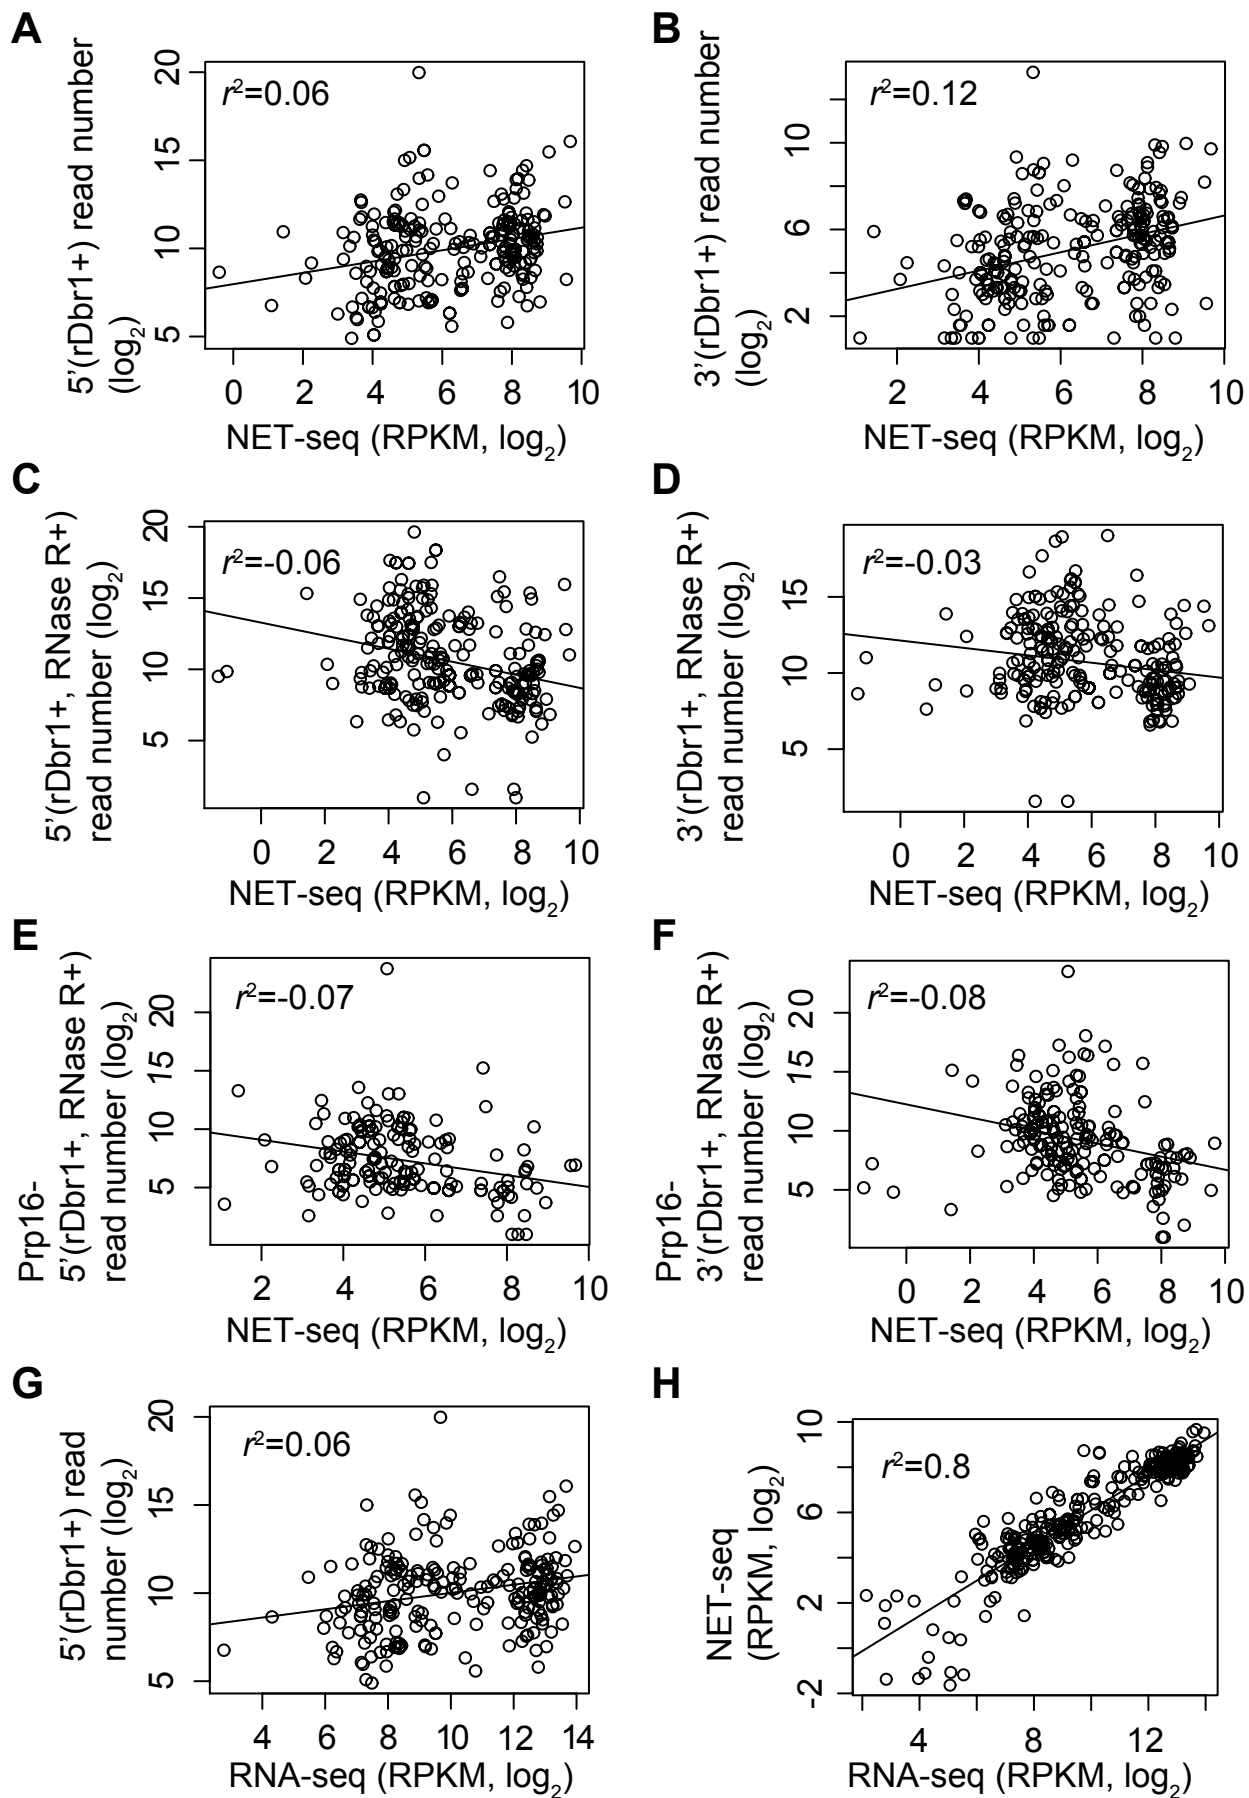

Figure S7

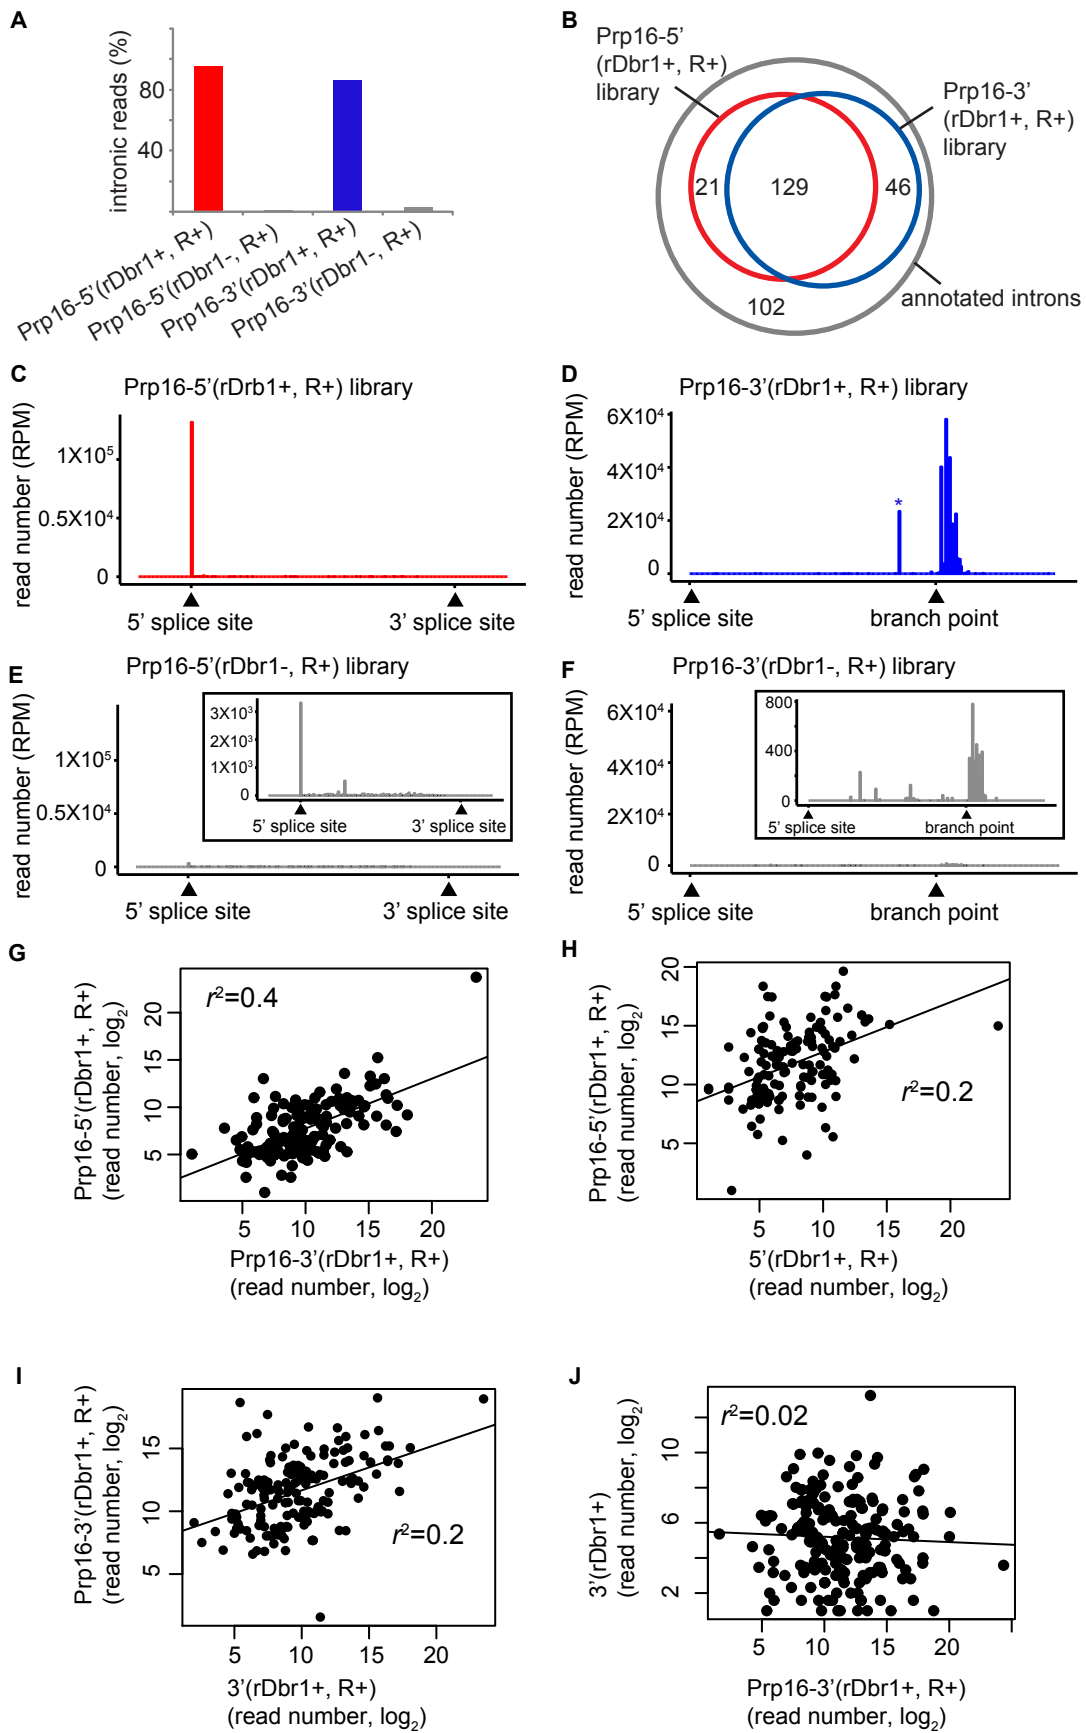

Figure S8

**A** *RPS14B*

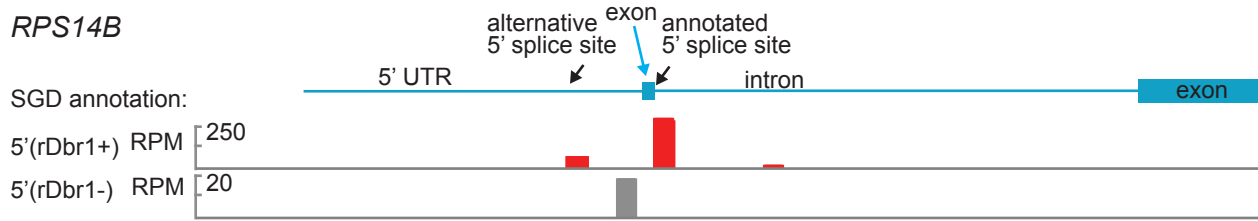

**B** lariat RT-PCR

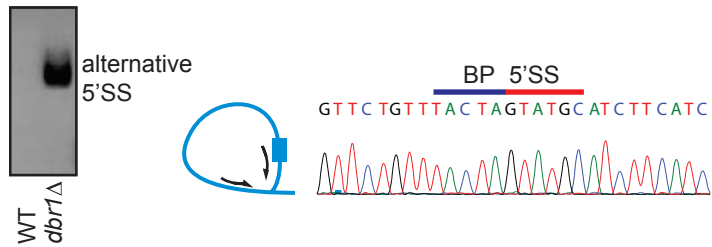

**C** mRNA RT-PCR

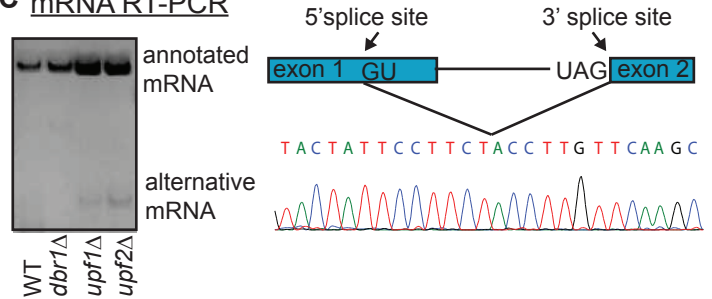

**D** *AML1*

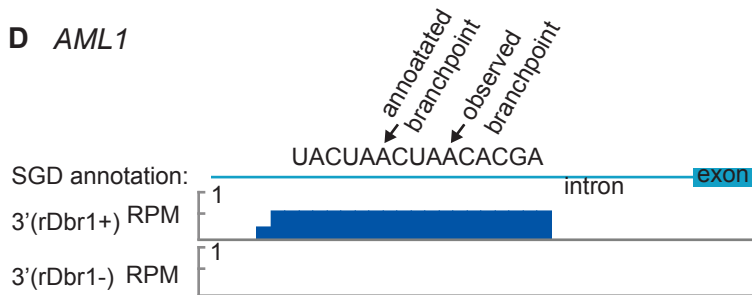

**E** lariat RT-PCR

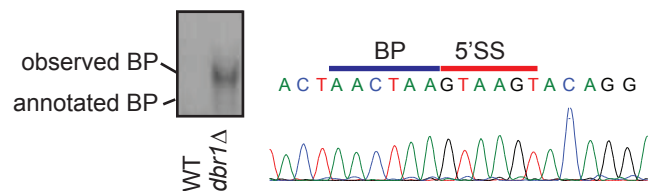

**F** *MSL5*

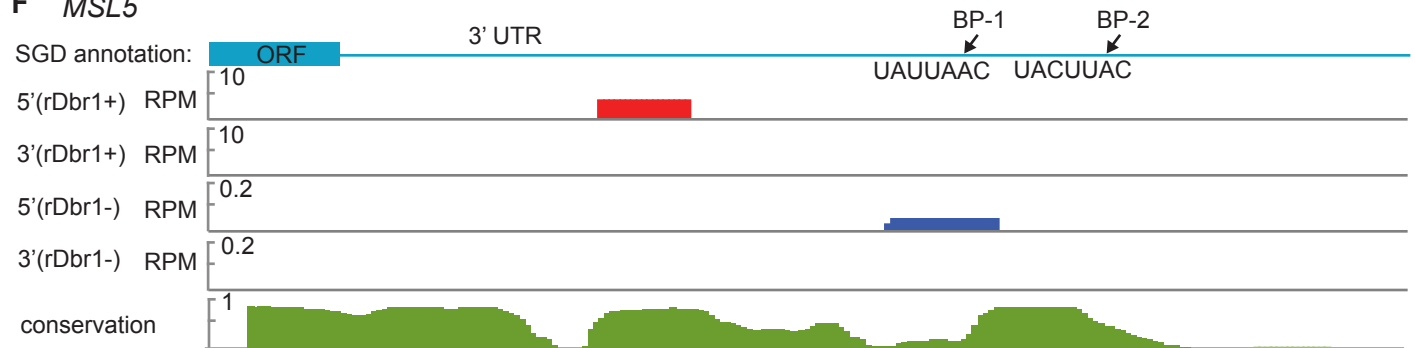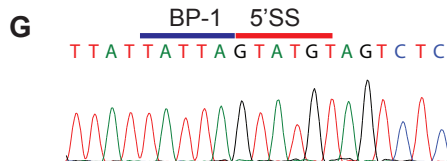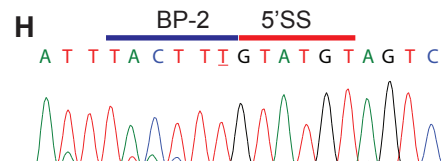

**I** *PRO3*

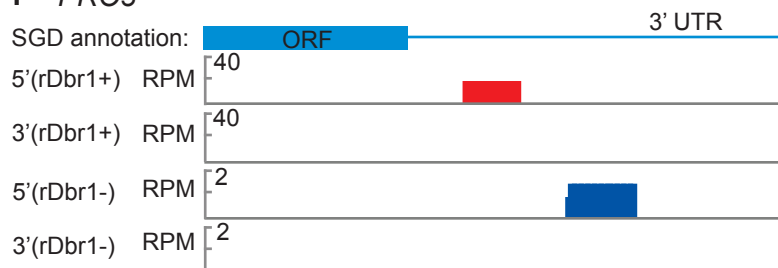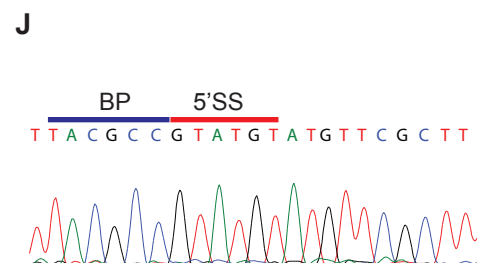

Supplement: Supp_Figures.pdf [file Supp_Figures.pdf]
