# Supplementary material
Source: HighWire-hosted journal article supplement (doi:10.1101/rna.052829.115)
Supplement: Supp_Tables.xlsx [file Supp_Tables.xlsx]

## Sheet: Table S1
Table S1. Summary statistics of mapping
	Total reads	Mapped readsa	Uniquely mapped readsb	Intronic readsc	Splicing site readsd	splicing site reads/ mapped reads	splicing site reads/ uniquely mapped reads	A-tailed readse	A-tailed & intronic readsf
dbr1∆_XRN1/CIP treated libraries
5'(rDbr1+)	9218021	6,843,344 (74%)	1,912,958 (28%)	1,776,752 (93%)	1,758,775 (99%)	0.257005	0.919401
3'(rDbr1+)	11519090	10,458,785 (91%)	36,031 (0.3%)	31,170 (87%)	18,747 (60%)	0.00179246	0.520302	11536	11,338 (99%)
5'(rDbr1-)	4760090	4,203,054 (88%)	289,996 (6.9%)	15,663 (5.4%)	2,983 (19%)	0.000709722	0.0102863
3'(rDbr1-)	8329053	5,127,710 (62%)	378,460 (7.4%)	18,218 (4.8%)	1,901 (10%)	0.000370731	0.00502299	22198	242 (1%)
dbr1∆_XRN1/CIP/RNase R treated libraries
5'(rDbr1+, RNase R+), rep. 1	4205032	3,916,878 (93%)	3,536,586 (90%)	3,411,445 (96%)	3,280,778 (96%)	0.8376	0.927668
5'(rDbr1+, RNase R+), rep. 2	5649575	4,722,849 (84%)	3,826,752 (81%)	3,606,830 (94%)	3,556,077 (99%)	0.752952	0.929268
5'(rDbr1+, RNase R+), rep. 3	4219807	3,601,639 (85%)	3,086,917 (86%)	2,691,309 (87%)	2,643,895 (98%)	0.734081	0.856484
5'(rDbr1-, RNase R+)	3966270	3,459,606 (87%)	237,163 (6.8%)	114,852 (48%)	27,401 (24%)	0.00792027	0.115537
3'(rDbr1+, RNase R+), rep. 1	43002896	35,195,354 (82%)	30,463,236 (87%)	28,819,128 (95%)	28,761,759 (99%)	0.817203	0.944147
3'(rDbr1+, RNase R+), rep. 2	15333747	10,176,060 (66%)	4,251,383 (42%)	3,460,931 (81%)	3,357,611 (97%)	0.329952	0.789769
3'(rDbr1+, RNase R+), rep. 3	11772858	8,557,805 (73%)	4,995,898 (58%)	4,299,341 (86%)	4,229,813 (98%)	0.494264	0.846657
3'(rDbr1-, RNase R+)	40936919	23,598,882 (58%)	2,230,212 (9.5%)	643,275 (29%)	411,770 (64%)	0.0174487	0.184633
3'(rDbr1+, RNase R+), rep. 1g	193740	67,554 (35%)	40,433 (60%)	30,775 (76%)	29,958 (97%)	0.443467	0.740929
3'(rDbr1+, RNase R+), rep. 2g	228026	67,486 (30%)	38,317 (57%)	25,385 (66%)	24,062 (95%)	0.356548	0.627972
3'(rDbr1+, RNase R+), rep. 3g	173197	55,310 (32%)	35,399 (64%)	23,750 (67%)	22,302 (94%)	0.403218	0.630018
3'(rDbr1-, RNase R+)g	946056	248,754 (26%)	26,710 (11%)	8,121 (30%)	3,189 (39%)	0.0128199	0.119393
Prp16-XRN1/CIP/RNase R treated libraries
Prp16-5'(rDbr1+, RNase R+)	16069419	14,980,006 (93%)	14,444,496 (96%)	14,281,548 (99%)	14,275,529 (99%)	0.952972	0.988302
Prp16-5'(rDbr1-, RNase R+)	5047294	4,015,191 (80%)	711,758 (18%)	49,785 (7%)	26,607 (53%)	0.00662658	0.0373821
Prp16-3'(rDbr1+, RNase R+)	24995669	15,618,472 (62%)	14,117,103 (90%)	13,408,520 (95%)	13,403,096 (99%)	0.858157	0.949423
Prp16-3'(rDbr1-, RNase R+)	11620027	5,534,833 (48%)	474,508 (9%)	178,096 (38%)	152,836 (86%)	0.0276135	0.322094
aReads that mapped to the genome perfectly. Percentages indicate fractions of total sequencing reads that mapped perfectly to the genome.
bReads that mapped to a single location in the genome. Percentages indicate fractions of mapped reads that mapped uniquely to the genome.
cUniquely mapped reads that mapped to an annotated intronic region. Percentage indicate fractions of uniquely mapped reads that mapped to intronic regions.
dUniquely mapped reads that covered annotated splicing sites. Percentages indicate fractions of intronic reads that covered splicing sites.
eOnly uniquely mapped reads are considered.
fReads that contains A tails and mapped to annotated intronic regions. Percentages indicate fractions of A-tailed reads that mapped to introns.
gAlternative analysis of 3'(rDbr1+, RNase R+) rep. 1, 3'(rDbr1+, RNase R+) rep. 2, 3'(rDbr1+, RNase R+) rep. 3, and 3'(rDbr1-, RNase R+) libraries with PCR duplicates removed (see Materials and Methods)

## Sheet: Table S2
Table S2. Summary of annotated introns detected by LIT-seq
gene	chromosome	intron length	identification by LIT-seq*
SNR17A	chrXV	157	+
SNR17B	chrXVI	130	+
YAL001C	chrI	90	-
YAL003W	chrI	366	+
YAL030W	chrI	113	-
YBL018C	chrII	75	+
YBL026W	chrII	128	+
YBL027W	chrII	384	+
YBL040C	chrII	97	+
YBL050W	chrII	116	-
YBL059C-A	chrII	85	+
YBL059W	chrII	69	-
YBL072C	chrII	308	+
YBL087C	chrII	504	+
YBL091C-A	chrII	88	3'
YBL092W	chrII	333	+
YBR048W	chrII	511	+
YBR062C	chrII	82	3'
YBR078W	chrII	330	+
YBR082C	chrII	95	+
YBR084C-A	chrII	506	+
YBR089C-A	chrII	380	+
YBR089C-A	chrII	357	+
YBR101C	chrII	128	+
YBR111W-A	chrII	80	5'
YBR111W-A	chrII	70	-
YBR119W	chrII	89	+
YBR181C	chrII	352	+
YBR186W	chrII	113	-
YBR189W	chrII	413	+
YBR191W	chrII	388	+
YBR215W	chrII	84	+
YBR220C	chrII	421	-
YBR230C	chrII	97	+
YBR237W	chrII	166	-
YBR255C-A	chrII	94	+
YCL002C	chrIII	76	3'
YCL005W-A	chrIII	77	+
YCL005W-A	chrIII	96	-
YCL012C	chrIII	65	+
YCR028C-A	chrIII	83	3'
YCR031C	chrIII	307	+
YCR097W	chrIII	54	3'
YCR097W	chrIII	52	5'
YDL012C	chrIV	86	+
YDL029W	chrIV	123	+
YDL061C	chrIV	409	-
YDL064W	chrIV	110	3'
YDL075W	chrIV	421	3'
YDL079C	chrIV	292	-
YDL082W	chrIV	365	+
YDL083C	chrIV	432	+
YDL108W	chrIV	81	+
YDL115C	chrIV	70	3'
YDL125C	chrIV	111	+
YDL130W	chrIV	301	+
YDL136W	chrIV	405	3'
YDL137W	chrIV	332	+
YDL189W	chrIV	99	+
YDL191W	chrIV	491	3'
YDL219W	chrIV	71	3'
YDR005C	chrIV	80	+
YDR025W	chrIV	339	+
YDR059C	chrIV	90	+
YDR064W	chrIV	539	+
YDR092W	chrIV	268	-
YDR099W	chrIV	743	3'
YDR129C	chrIV	111	+
YDR139C	chrIV	73	+
YDR305C	chrIV	89	+
YDR318W	chrIV	83	+
YDR367W	chrIV	101	-
YDR381C-A	chrIV	194	-
YDR381W	chrIV	766	+
YDR397C	chrIV	92	+
YDR424C	chrIV	80	+
YDR424C	chrIV	96	+
YDR447C	chrIV	314	+
YDR450W	chrIV	435	+
YDR471W	chrIV	384	+
YDR500C	chrIV	389	+
YEL003W	chrV	88	3'
YEL012W	chrV	123	+
YER003C	chrV	93	+
YER007C-A	chrV	103	+
YER044C-A	chrV	88	-
YER056C-A	chrV	397	+
YER074W	chrV	466	-
YER074W-A	chrV	111	+
YER074W-A	chrV	102	-
YER093C-A	chrV	75	+
YER102W	chrV	360	+
YER117W	chrV	471	+
YER131W	chrV	361	+
YER133W	chrV	525	+
YER167W	chrV	78	+
YER179W	chrV	92	-
YFL034C-A	chrVI	321	+
YFL034C-B	chrVI	114	+
YFL039C	chrVI	308	+
YFR024C-A	chrVI	118	+
YFR031C-A	chrVI	147	+
YFR032C-A	chrVI	331	+
YFR045W	chrVI	72	+
YGL030W	chrVII	230	+
YGL031C	chrVII	456	+
YGL033W	chrVII	70	-
YGL063W	chrVII	80	-
YGL076C	chrVII	468	+
YGL076C	chrVII	459	+
YGL087C	chrVII	85	-
YGL103W	chrVII	511	+
YGL137W	chrVII	200	+
YGL178W	chrVII	640	-
YGL183C	chrVII	83	+
YGL187C	chrVII	342	3'
YGL189C	chrVII	368	3'
YGL226C-A	chrVII	149	+
YGL232W	chrVII	58	+
YGL251C	chrVII	152	-
YGR001C	chrVII	93	+
YGR001C	chrVII	62	+
YGR027C	chrVII	312	+
YGR029W	chrVII	83	+
YGR034W	chrVII	477	+
YGR118W	chrVII	319	+
YGR148C	chrVII	392	+
YGR183C	chrVII	213	+
YGR214W	chrVII	455	-
YGR225W	chrVII	93	5'
YHL001W	chrVIII	398	+
YHR001W-A	chrVIII	63	+
YHR010W	chrVIII	561	+
YHR012W	chrVIII	119	+
YHR016C	chrVIII	168	+
YHR021C	chrVIII	550	3'
YHR039C-A	chrVIII	162	+
YHR041C	chrVIII	101	+
YHR076W	chrVIII	93	+
YHR077C	chrVIII	113	+
YHR079C-A	chrVIII	86	-
YHR097C	chrVIII	124	+
YHR101C	chrVIII	87	+
YHR123W	chrVIII	91	+
YHR141C	chrVIII	441	+
YHR199C-A	chrVIII	67	+
YHR203C	chrVIII	269	+
YIL004C	chrIX	131	+
YIL018W	chrIX	400	+
YIL052C	chrIX	472	+
YIL069C	chrIX	409	+
YIL073C	chrIX	90	-
YIL106W	chrIX	85	+
YIL111W	chrIX	88	-
YIL123W	chrIX	487	+
YIL133C	chrIX	290	+
YIL148W	chrIX	434	+
YIL156W-A	chrIX	62	+
YJL001W	chrX	116	+
YJL024C	chrX	77	+
YJL031C	chrX	87	+
YJL041W	chrX	118	+
YJL130C	chrX	320	+
YJL136C	chrX	460	-
YJL177W	chrX	317	3'
YJL189W	chrX	386	+
YJL191W	chrX	408	+
YJL205C-A	chrX	143	-
YJR021C	chrX	80	-
YJR094W-A	chrX	275	+
YJR145C	chrX	256	+
YKL002W	chrXI	68	+
YKL006C-A	chrXI	141	+
YKL006W	chrXI	398	+
YKL081W	chrXI	326	+
YKL150W	chrXI	88	+
YKL156W	chrXI	351	3'
YKL157W	chrXI	383	-
YKL180W	chrXI	306	+
YKL186C	chrXI	163	-
YKL186C	chrXI	213	-
YKL186C	chrXI	154	-
YKL186C	chrXI	204	-
YKL186C	chrXI	99	-
YKL186C	chrXI	149	-
YKL190W	chrXI	76	-
YKR004C	chrXI	104	+
YKR005C	chrXI	69	-
YKR057W	chrXI	322	+
YKR094C	chrXI	368	+
YKR095W-A	chrXI	75	+
YLL050C	chrXII	179	+
YLR048W	chrXII	359	+
YLR054C	chrXII	87	-
YLR061W	chrXII	389	+
YLR078C	chrXII	89	+
YLR093C	chrXII	141	+
YLR128W	chrXII	94	5'
YLR185W	chrXII	359	-
YLR199C	chrXII	86	+
YLR211C	chrXII	59	-
YLR275W	chrXII	90	+
YLR287C-A	chrXII	430	+
YLR306W	chrXII	134	+
YLR316C	chrXII	56	+
YLR316C	chrXII	68	-
YLR329W	chrXII	97	-
YLR333C	chrXII	423	-
YLR344W	chrXII	447	+
YLR367W	chrXII	483	+
YLR367W	chrXII	557	-
YLR388W	chrXII	488	+
YLR406C	chrXII	349	+
YLR426W	chrXII	71	5'
YLR445W	chrXII	82	-
YLR448W	chrXII	384	+
YML017W	chrXIII	362	3'
YML024W	chrXIII	398	+
YML025C	chrXIII	99	+
YML026C	chrXIII	401	+
YML034W	chrXIII	130	+
YML034W	chrXIII	126	+
YML036W	chrXIII	106	+
YML056C	chrXIII	408	+
YML067C	chrXIII	93	+
YML073C	chrXIII	415	+
YML085C	chrXIII	116	+
YML094W	chrXIII	83	+
YML124C	chrXIII	298	+
YMR033W	chrXIII	86	+
YMR079W	chrXIII	156	+
YMR116C	chrXIII	273	+
YMR125W	chrXIII	322	+
YMR133W	chrXIII	116	-
YMR142C	chrXIII	402	+
YMR143W	chrXIII	544	+
YMR147W	chrXIII	95	+
YMR194C-B	chrXIII	72	-
YMR194W	chrXIII	463	+
YMR201C	chrXIII	84	+
YMR225C	chrXIII	147	+
YMR230W	chrXIII	410	+
YMR242C	chrXIII	477	+
YMR292W	chrXIII	82	+
YNL004W	chrXIV	342	+
YNL012W	chrXIV	84	-
YNL038W	chrXIV	74	+
YNL044W	chrXIV	79	+
YNL050C	chrXIV	91	-
YNL066W	chrXIV	346	+
YNL069C	chrXIV	449	+
YNL096C	chrXIV	345	+
YNL112W	chrXIV	1002	+
YNL130C	chrXIV	92	+
YNL138W-A	chrXIV	122	+
YNL147W	chrXIV	96	+
YNL162W	chrXIV	512	+
YNL246W	chrXIV	95	+
YNL265C	chrXIV	105	+
YNL301C	chrXIV	432	+
YNL302C	chrXIV	551	+
YNL312W	chrXIV	108	+
YNR053C	chrXIV	531	+
YOL047C	chrXV	63	-
YOL048C	chrXV	78	+
YOL120C	chrXV	447	+
YOL121C	chrXV	390	+
YOL127W	chrXV	414	+
YOR096W	chrXV	401	+
YOR122C	chrXV	209	3'
YOR182C	chrXV	411	+
YOR234C	chrXV	527	+
YOR293W	chrXV	437	+
YOR312C	chrXV	426	+
YPL031C	chrXVI	102	+
YPL075W	chrXVI	751	+
YPL079W	chrXVI	421	5'
YPL081W	chrXVI	501	+
YPL090C	chrXVI	394	+
YPL109C	chrXVI	152	+
YPL129W	chrXVI	105	+
YPL143W	chrXVI	525	+
YPL175W	chrXVI	100	+
YPL198W	chrXVI	409	+
YPL198W	chrXVI	407	+
YPL218W	chrXVI	139	+
YPL230W	chrXVI	75	+
YPL241C	chrXVI	80	+
YPL249C-A	chrXVI	238	+
YPR010C-A	chrXVI	143	+
YPR028W	chrXVI	133	+
YPR043W	chrXVI	403	+
YPR063C	chrXVI	86	+
YPR098C	chrXVI	96	-
YPR132W	chrXVI	365	+
YPR153W	chrXVI	134	+
YPR170W-B	chrXVI	99	5'
YPR187W	chrXVI	76	+
*This table only considers reads from 5'(rDbr1+) and 3'(rDbr1+) libraries . "+" indicates that both 5' and 3' reads mapped to the annotated intron; "5'" indicates that only 5' reads map to the annotated intron; "3'" indicates that only 3' reads map to the annotated intron; "-" indicates that no reads mapped to the annotated intron.

## Sheet: Table S3
Table S3. Summary of 3' (rDbr1+) reads that mapped only after trimminga.
identity of 3' nt	# of trimmed nt	mapped to annotated introns	mapped to other regionsb
A	1	2630	137
	2	768	31
	3	408	33
	4	149	1
	5	101	2
	6	30	5
	7	7	0
U	1	9	0
	2	0	1
	3	0	1
	4	0	1
C	1	10	183
	2	4	109
	3	0	0
	4	0	0
G	1	29	19
	2	0	0
	3	1	0
	4	0	0
aOnly uniquely mapped reads are reported; and the reads derived from PMI40 are not included (see Materials and Methods). bNote that adenosine tailing is also observed for reads that did not map to annotated introns. A large population of these reads map to tRNAs and other ncRNAs, as expected; while a subpopulation of these reads map to novel introns identified in this study. Note that the one- an…

## Sheet: Table S4
Table S4. Splicing sites used in the novel splicing events detected by LIT-seq
LIT-seq library	intron	novel 5' splice sitea	chromosomal positionb	novel branch sitec	chromosomal positiond	3' splice sitee	chromosomal positionf
dbr1∆ untreated with RNase R	AML1i			acuAACUAACacg	chrVII (497953)	N.D.
	DIC1	GUAUGCau	chrXII (827949)	auuGACUAACaug	chrXII (827562)	N.D.
	GLE2	GUUUGUuc	chrV (374725)	agaGACUGACuuah	chrV (374676)	N.D.
	MATa1i	GUAUGGcg	chrIII (293851)			CAG	chrIII (293993)
	MSL5i	GUAUGUag	ChrXII (382301)	uauUAUUAACuuu	chrXII (382366)	UAG	chrXII (382412)
	MSL5i			auuUACUUACuagh	chrXII (382388)	UAG	chrXII (382412)
	OPT1	GUAUGCuu	chrX (34957)	aauGACUAACcaa	chrX (34651)	N.D.
	PRO3i	GUAUGUau	chrV (201954)	uauUACUGACcuuh	chrV (201999)	UAG	chrV (202096)
	PTC3i	GUAUGUau	chrII (115475)	gugUACUUACuaah	chrII (115533)	UAG	chrII (115569)
	QDR2	GUAAGUau	chrX (133974)	auuCACUAACaua	chrX (134044)	N.D.
	RGT2 antisenseg,i	GUAUGUau	chrIV (215384)	guuUACUAACgag	chrIV (215273)	N.D.
	RPS14B	GUAUGCau	chrX (73724)			UAG	chrX (74204)
	SFB2	GUAUGCca	chrXIV (537856)	uagGGCUAACucah	chrXIV (537763)	N.D.
	TEX1	GUAUGUag	ChrXIV (169599)	cgcCACUAACcau	chrXIV (169817)	N.D.
	YBR255C-Ai			aauCGCUAACacah	chrII (726952)	N.D.
	YDR541C	GUAUGCug	chrIV (1519591)	ucaGACUAACcau	chrIV (1519520)	N.D.
	YJLWdelta10g,i	GUAUGAua	chrX (422555)	uauUACUAAUauah	chrX (422637)	N.D.
dbr1∆ treated with RNase R	ADE2	GUAUGG	chrXV (566193)	UGCUAAC	chrXV (565984)
	AML1i			AACUAAC	chrVII (497953)
	COG4	GUAAGC	chrXVI (739795)	UAUUAAC	chrXVI (739752)
	CPA2i	GUAUGC	chrX (633060)	AACUAAC	chrX (633006)
	FMP45i	GUUCGU	chrIV (61787)	UAUUGACh	chrIV (61738)
	GSY1	GUAUGG	ChrVI (176393)	AACUAAC	ChrVI (176336)
	JIP4 antisenseg	GUAUGU	chrIV(1406993)	UACUAAC	chrIV(1407185)
	LSB6	GUAUGU	chrX(236903)	CACUGACh	chrX (237010)
	LSM2			AACUAAC	chrII (170727)
	MATa1i	GUAUGG	chrIII (293851)
	MRM2	GUAUGA	chrVII (253248)	UACUAAUh	chrVII (253201)
	MSL5i	GUAUGU	ChrXII (382301)	UAUUAAC	chrXII (382366)
	MSS2 antisenseg,i	GUAUGU	ChrIV (269043)	UACUGACh	chrIV (268934)
	MYO2i	GUAAGU	chrXV (930066)	CGCUAACh	chrXV (930119)
	PCL2	GUAUGA	chrIV (235049)	UUCUAACh	chrIV (235108)
	PCL2	GUAUCU	chrIV (234969)	UUCUAACh	chrIV (235108)
	PRO3i	GUAUGU	chrV (201954)	UACUGACh	chrV (201999)
	PTC3i	GUAUGU	chrII (115475)	UACUUACh	chrII (115533)
	PUS2	GUAUGU	chrVII (383486)	UAUUAAC	chrXIV (383552)
	RGT2 antisenseg,i	GUAUGU	chrIV (215384)	UACUAAC	chrIV (215273)
	SNA2 antisenseg	GUAUGU	chrIV(1490578)	GACUAAC	chrIV(1490524)
	SPT14i	GCAUGU	chrXVI (218662)
	TUS1 antisenseg,i	GUAUGU	chrXII (982538)	GACUAAC	chrXII (982473)
	UTP4 antisenseg	GUAUGU	chrIV(1114291)	UACUAAC	chrIV (1114337)
	VPS62	GUAUGU	chrVII (772014)	UACUGACh	chrVII (772100)
	YAR053W	GUAUGA	chrI (208369)	UACUAAC	chrI (208475)
	YBR094C	GUAAGU	chrII (44177)	AAUUAAC	chrII (44124)
	YBR255C-Ai			CGCUAACh	chrII (726952)
	YDR034C-C antisenseg	GUAGGUh	chrIV(518396)	UACUGACh	chrIV (518510)
	YFL002W-B antisenseg	GUAGGUh	ChrVI (139163)	UACUGAC	ChrVI (139062)
	YHL049C	AUAUGUh	chrIVIII (3794)	UACUAAC	chrVIII (3713)
	YHR056W-A	GUAUGG	chrIVIII (217286)	UACUAAC	chrVIII (217422)
	YHR112C	GUACGU	chrIVIII (355672)	UACUGACh	chrVIII (335605)
	YJLWdelta10g,i	GUAUGA	chrX (422555)	UACUAAUh	chrX (422637)
	YKL133Ci	GUAUGU	chrXI (193072)	CACUAAC	chrXI (193012)
	YPR091Ci	GUAUGC	chrXVI (717147)	UACUAAC	chrXVI (717060)
Prp16-IP treated with RNase R	AML1i			AACUAAC	chrVII (497953)
	CPA2i	GUAUGC	chrX (633060)	AACUAAC	chrX (633006)
	FMP45i	GUUCGU	chrIV (61787)	UAUUGACh	chrIV (61738)
	MSS2 antisenseg,i	GUAUGU	ChrIV (269043)	UACUGAC	chrIV (268934)
	MYO2i	GUAAGU	chrXV (930066)	CGCUAACh	chrXV (930119)
	PRO3i	GUAUGU	chrV (201954)	UACUGACh	chrV (201999)
	RGT2 antisenseg,i	GUAUGU	chrIV (215384)	UACUAAC	chrIV (215273)
	SPT14i	GCAUGU	chrXVI (218662)
	TUS1 antisenseg,i	GUAUGU	chrXII (982538)	GACUAAC	chrXII (982473)
	YBR255C-Ai			CGCUAAC	chrII (726952)
	YJLWdelta10g,i	GUAUGA	chrX (422555)	UACUAAUh	chrX (422637)
	YKL133Ci	GUAUGU	chrXI (193072)	CACUAAC	chrXI (193012)
	YPR091Ci	GUAUGC	chrXVI (717147)	UACUAAC	chrXVI (717060)
aDeviations from the 5’ splice site consensus sequence are colored red. Consensus positions are capitalized. bThe chromosomal position of the first nucleotide of the 5’ splice site is shown. cDeviations from the branch site consensus sequence are colored red. Consensus positions are capitalized. dThe chromosomal position of the branch point is shown. e3' splice sites that were confirmed by Sanger…

## Sheet: Table S5
Tabel S5. Oligos used in this study
Oligos for constructing RNase R-untreated libraries
rDQ2	/5'Appp/rGrUrCrGrGrArArUrCrArUrCrGrUATGCACTCGAGGAGTC/3Bio/
rDQ3	/5AmMC6/CTCGAGTTCTACrArGrUrCrCrGrArCrGrArUrC
oDQ56a	CAAGCAGAAGACGGCATACGAGTATTCCGAC
oDQ65Ba	CAAGCAGAAGACGGCATACGAGCGTTCCGAC
oDQ49	AATGATACGGCGACCACCGACAGGTTCAGAGTTCTACAGTCCGACGATC
oDQ68 (for duplex A)a	ATAATCGTATGCCGTCTTCTGCTT
oDQ69 (for duplex A)a	CAAGCAGAAGACGGCATACGATTATNN
oDQ70B (for duplex B)a	ACGATCGTATGCCGTCTTCTGCTTG
oDQ71B (for duplex B)a	CAAGCAGAAGACGGCATACGATCGTNN
oDQ76 (for duplex C)	AGTTCTACAGTCCGACGATCTGNN
oDQ77 (for duplex C)	CAGATCGTCGGACTGTAGAACT
oDQ182	CAAGCAGAAGACGGCATACGA
Oligos for constructing RNAse R-treated libraries
oDQ515b	CAAGCAGAAGACGGCATACGANNNNNNNNNNNCGTATACGATGATTCCGAC
oDQ516 b	CAAGCAGAAGACGGCATACGANNNNNNNNNNNACGATACGATGATTCCGAC
oDQ517 b	CAAGCAGAAGACGGCATACGANNNNNNNNNNNTACATACGATGATTCCGAC
oDQ518 b	CAAGCAGAAGACGGCATACGANNNNNNNNNNNGTAATACGATGATTCCGAC
oDQ174 (for duplex D)a	AGAGTCGTATGCCGTCTTCTGCTTG
oDQ175 (for duplex D)a	CAAGCAGAAGACGGCATACGACTCTNN
oDQ176 (for duplex E)a	CTCTTCGTATGCCGTCTTCTGCTTG
oDQ177 (for duplex E)a	CAAGCAGAAGACGGCATACGAAGAGNN
oDQ178 (for duplex F)a	GAGATCGTATGCCGTCTTCTGCTTG
oDQ179 (for duplex F)a	CAAGCAGAAGACGGCATACGATCTCNN
oDQ180 (for duplex G)a	TCTCTCGTATGCCGTCTTCTGCTTG
oDQ181 (for duplex G)a	CAAGCAGAAGACGGCATACGAGAGANN
Oligos for constructing Prp16-IP libraries
oDQ157a	CAAGCAGAAGACGGCATACGAACGTATACGATGATTCCGAC
oDQ158a	CAAGCAGAAGACGGCATACGATACGATACGATGATTCCGAC
oDQ166 (for duplex H)a	ACGTTCGTATGCCGTCTTCTGCTTG
oDQ167 (for duplex H)a	CAAGCAGAAGACGGCATACGAACGTNN
oDQ168 (for duplex I)a	CGTATCGTATGCCGTCTTCTGCTTG
oDQ169 (for duplex I)a	CAAGCAGAAGACGGCATACGATACGNN
oligos for validating novel intronsc
oDQ155 (YDR541C intron F)	TTGTAGTACCATTGACTCTTC
oDQ156 (YDR541C intron R)	GGTTCGAAAAGGCTTGATATG
oDQ185 (MATa1 intron R)	TATCCTTGAAATGAAAAC
oDQ186 (MATa1 intron F)	GCCTTTGAATCAATTTAC
oDQ187 (MATa1 mRNA R)	GCCTTTGAATCAATTTAC
oDQ188 (MATa1 mRNA F)	GACAACATGGATGATATTTG
oDQ150 (MSL5 intron F)	GGTTTTTTGCCTTCCTGG
oDQ151 (MSL5 intron R)	GGAACTATGCAAAATAGAG
oDQ191 (MSL5 mRNA F)	GGGTTTTCTAATAACATGGGC
oDQ192 (MSL5 mRNA R)	CATTGTAGTTCAGGCCGTAG
oDQ228 (PTC3 intron F)	CCTATTAATAGTTTAAGCATAATTAG
oDQ305 (PTC3 intron R)	ATGGTGCGCATATACATAC
oDQ229 (PTC3 mRNA F)	TAACCTTTGAATCCTTTTTGATG
oDQ230 (PTC3 mRNA R)	GAAGACGACCTGTAAGATATTTGG
oDQ232 (PRO3 intron F)	GCCGTATATTATTTTTTTATTAC
oDQ306 (PRO3 intron R)	TACAAAGCGAACATACATAC
oDQ415 (PRO3 mRNA F)	CCAAAAGAAGAAATAGATTGC
oDQ416 (PRO3 mRNA R)	CATTTCAAATGAATCAATTGC
oDQ307 (QDR2 intron R)	gggAAAAAAAAAAATACTTAC
oDQ234 (QDR2 intron F)	CTAAAATTAGAGTTAGCAGCACG
oDQ417 (QDR2 mRNA F)	GGTGTGATAAGTCTTCTC
oDQ418 (QDR2 mRNA R)	CACCTCCAGCATATTTTC
oDQ373 (RPS14B intron R)	GGGAGTTGTTGATTTCAGTC
oDQ374 (RPS14B Intron F)	GTTAGATAGTGACTCATTCG
oDQ237 (RPS14B mRNA F)	GTATAAAAGCGGTACTATTCCTTC
oDQ238 (RPS14B mRNA R)	GACTTGAGAGTTATCGCGAGC
oDQ308 (AML1 intron R)	GTTGAAAATATCCTGTAC
oDQ310 (AML1 intron F)	ACAGTAACGTAGAATTAC
oDQ312 (ncRNA intron R)	TGGGGAATGGTTTGGGTCTG
oDQ313 (ncRNA intron F)	GGGTTTAAACTCTGTAGATG
oDQ375 (YJLWdelta10 Intron R)	CTATCGTAACAATGGGAATG
oDQ376 (YJLWdelta10 Intron F)	GAGGATCAACTATAATCTATC
oDQ377 (OPT1 intron R)	AAAACGGCGATAACAGCG
oDQ378 (OPT1 intron F)	GTCCACTGCATCTTATAC
oDQ401 (OPT1 mRNA F)	ATAAGGAATACTCACCGG
oDQ402 (OPT1 mRNA R)	AAAGGCAGCATATAACCGC
oDQ383 (DIC1 intron R)	GAGAAACGAACCTCTACAC
oDQ384 (DIC1 intron F)	GACGGCATGTCAACCAAC
oDQ399 (DIC1 mRNA F)	CGGCTTGTAGTGTATATAT
oDQ400 (DIC1 mRNA R)	CTGATATTTACAACATCTGC
oDQ403 (GLE2 intron R)	TATATAGTGCTTAACCGG
oDQ404 (GLE2 intron F)	ACCATTTTACTTGAACAG
oDQ413 (SFB2 intron R)	CTGCTGTTGCTCTGCAAC
oDQ414 (SFB2 intron F)	CTCAACAACAAATCGACC
oDQ389 (YBR255C-A intron R)	GGGCCAGATATATTCTTG
oDQ390 (YBR255C-A intron F)	TGTCTTGTTCACCCCAG
oligos for Northern
oDQ46 (ACT1 intron R)	CGTGGTTATTACAGATCAG
oDQ258 (U3A intron R)	AAACTCTAGTACCTAAGACTTTTAGATG
aBarcodes for sorting libraries are shown in bold; MmeI sites are shown in red.
bRandom barcodes for removing PCR duplicates are underlined; barcodes for sorting libraries are shown in bold; MmeI sites are shown in red;
cOligos used for lariat RT-PCR are indicated as "intron F" and "intron R"; oligos used for mRNA RT-PCR are indicated as "mRNA F" and "mRNA R".
