# Supplementary material
Source: HighWire-hosted journal article supplement (doi:10.1101/rna.052829.115)
Supplement: SuppLegends_Notes.docx [file SuppLegends_Notes.docx]

**Fig. S1. Distribution of LIT-seq reads across the yeast genome.**

(**A-L**) Pie charts show the distribution of all mapped reads between the following annotated, genomic classes: intron, exon, rRNA, tRNA, snRNA, and other regions. The genomic coordinates for each class was fetched from the UCSC database by keyword matching. Panel **A**-**D**, LIT-seq libraries derived from *dbr1Δ* whole-cell RNA untreated with RNase R; in panels **C** and **D**, the smaller pie charts show only the distribution of reads mapping to non-rRNA regions. Panel **E**-**H**, LIT-seq libraries derived from *dbr1Δ* whole-cell RNA treated with RNase R. Panel **I**-**J**, LIT-seq libraries derived from Prp16-IP RNA treated with RNase R.

**Fig. S2. LIT-seq revealed introns across a wide dynamic range of reads.**

(**A**) Introns were detected over a 1000-fold range of reads. Histograms show the number of 5' reads (left panel) or 3' reads (right panel) for each intron, ranked from highest to lowest. (**B**) The number of 5' and 3’ reads correlate, as expected from the design of LIT-seq. The number of 3' reads were plotted as a function of the number of 5' reads for each intron.

**Fig. S3. LIT-seq optimization: the timing of 3' adapter ligation, relative to debranching.**

(**A**) The mode for the genomically-encoded tail length for lariats is 2 nt, regardless of oligo A tail length, indicating that the LIT-seq protocol is generally not sensitive to actual lariat tail length. Intronic reads were sorted into eight subgroups based on oligo-A tail length (i.e., 0A, 1A … 7A), and then for each subgroup the distribution of reads (normalized to total reads for each subgroup) was plotted as a function of genomically-encoded tail length, relative to the branchpoint. (**B**,**C**) Debranching is efficient before or after 3’ adapter ligation (cf. Chapman and Boeke 1991; Khalid et al. 2005), but 3’ adapter ligation is more efficient after debranching. Whole-cell RNA from *dbr1Δ* cells was debranched and/or ligated to a 3’ adapter, as indicated, and then probed for the *U3A* (**B**) or *ACT1* (**C**) intron by northern probes targeting the body of lariat RNAs. The position of all RNA species are indicated. (**D**-**F**) The lariats from *RPS24B* (**D**), *U3A* (**E**) and *ACT1* (**F**) all revealed 2 nt tails regardless of whether we ligated the 3’ adapter after (top) or before (bottom) debranching. Whole-cell RNA from *dbr1Δ* cells was ligated to a 3’ adapter before or after debranching, and then the indicated introns were analyzed by 3' RACE, TOPO cloning, and Sanger sequencing to define the 3' end of the lariat RNAs; ~8 clones were analyzed in each case. The number of clones is plotted as a function of the 3' termini positions, relative to the branch point.

**Fig. S4. RNase R treatment further enriched 3’(rDbr1+) libraries for branch sites.**

(**A**) A model rationalizing the capture of intron lariat 3’ ends upstream of the branch site in 3’(rDbr1+) LIT-seq libraries that were not treated with RNase R (Fig. 3D). In this model, as already established *in vivo* (Ooi et al. 1998), due to the resistance of a lariat to exonucleases in *dbr1∆* cells an endonuclease (endo) instead cleaves the lariat, generating a Y-shape intronic RNA with two 3’ ends. After CIP treatment, both ends can ligate to the 3' adapter, as illustrated. However, after rDbr1 treatment, only the endonucleolitically-generated 3’ end is physically associated with a phosphorylated 5’ end, corresponding to the 5’ splice site; consequently, only this fragment incorporates into the library, through ligation to the 5’ adapter. Note: while the 3' tags of such molecules mapped upstream of branch sites, the 5’ tags still mapped to 5’ splice sites. Unlike intact, lariat intronic RNA, these cleaved, Y-shaped intronic RNAs are degraded by RNase R (Suzuki et al. 2006), as illustrated. Note: the color scheme is as in Fig. 1. (**B-I**) RNase R treatment de-enriched for reads upstream of the branch site and enriched for reads just downstream of the branch site. Panel **B** shows that the majority of mapped 5' and 3' reads mapped to annotated introns. Bar graph is shown as in Fig. 2A, except that total percentage of mapped reads rather than unique reads, are shown to emphasize the exceptional specificity of this variation of LIT-seq. Panel **C** shows that the 5’(rDbr1+) and 3’(rDbr1+) libraries captured the majority of annotated introns. The Venn diagram is illustrated as in Fig. 2B. In panels **B** and **C**, reads were first combined from all three replicates before the analysis. Meta analyses are displayed in panels **D-I** for replicate 2 of the RNase R-treated library and show the mapping of reads to normalized intronic windows, as in Figure 3. Panel **D** displays the 5'(rDbr1+) reads, and panels **F** and **H** display the 3' (rDbr1+) reads, before and after removing PCR duplicates, respectively. Panels **E**, **G**, and **I** show the corresponding (rDbr1-) control libraries, with insets showing zoomed in views (Supplementary Note 3). In panel G and I, the highest peak (*) corresponds to reads mapping to the intron from *QCR10*.

**Fig. S5. LIT-seq is reproducible.**

(**A**, **B**) Correlations between biological replicates for reads mapped to introns. Panel **A** and **B** show the correlation between two biological replicates of a 5' library and a 3' library, respectively. (**C**) Correlation between 5' and 3' libraries, plotted as in Fig. S2B. (**D**) Correlation between datasets with and without PCR amplification. The panel shows the correlation between the read numbers before removing PCR duplicates versus the read numbers after removing PCR duplicates, for rep. 1 of the 3'(rDbr1+, RNase R+) library. (**E**, **F**) Tests for correlation between datasets with and without RNase R treatment.

**Fig. S6. Tests for correlations between intronic reads and nascent or mRNA reads.**

(**A-F**) Tests for correlations between the number of intronic reads for a given gene from various LIT-seq libraries and the number of corresponding normalized, nascent transcript reads from NET-seq (Churchman and Weissman 2011). Panels **A**, **C** and **E** show 5' LIT-seq libraries; panels **B**, **D** and **F** show 3' LIT-seq libraries; panels **A-D** show LIT-seq libraries derived from *dbr1∆* cells, with or without RNase R treatment; panels **E** and **F** show LIT-seq libraries derived from endogenous spliceosomes immunoprecipitated with anti-Prp16 antibodies. (**G**) An example of a test for correlation between the number of intronic reads for a given gene in a LIT-seq library – the 5'(rDbr1+) library derived from *dbr1∆* cells *–* and the number of mRNA reads for the corresponding gene in an RNA-seq library (Yassour et al. 2009). (**H**) The number of nascent transcript reads correlates with the number of corresponding mRNA reads for a given intron-containing gene. In all panels, intronic reads were reported as raw read number, while nascent transcript and mRNA reads were normalized to RPKM (reads per kilobase of transcript per million mapped reads).

**Fig. S7. LIT-seq, when coupled to immunoprecipitation of the spliceosome, revealed lariats from a wild-type strain, without stabilization of lariats.**

Introns were enriched by immunoprecipitation of endogenous spliceosomes via Prp16, rather than by deletion of *DBR1*. (**A**) The majority of 5' and 3' reads mapped to annotated introns. Bar graph is shown as in Fig. S4B. (**B**) The 5’ and 3’ libraries each captured the majority of annotated introns. The Venn diagram is shown as in Fig. 2B. (**C-F**) The 5’ and 3’ reads mapped specifically to 5' splice sites and branch sites, respectively, as illustrated genome-wide. Reads in panels **C** and **D** are plotted as inFigs. 3A and D, respectively; reads in panel **E** and **F** were from the (rDbr1-) control libraries and plotted as in Fig. 3B and E. In panel D, the asterisk indicates reads mapped to the alternative, novel branch site of *YBR255C-A* (CGCUAAC), as defined in Fig 5E. (**G**) The read numbers for a given intron in the 5' and 3' libraries correlate. (**H-J**) Tests for correlations between different LIT-seq libraries. Panels **H** and **I** show tests for correlations between the Prp16-IP and *dbr1∆* libraries, both treated with RNase R; (H) 5' library, (I) 3' library; note that the libraries derive from different strains grown under different conditions. Panel **J** shows a test for correlation between the 3’ reads of the Prp16-IP library and the 3’ reads of the *dbr1∆* library without RNase R treatment.

**Fig. S8. Other examples of alternative splice sites and novel introns.**

(**A-J**) The 5’ and 3’ (rDbr1+) LIT-seq libraries also revealed an alternative 5' splice site in *RPS14B* (**A-C**), the utilized branch site in *AML1* (**D**-**E**), and novel introns in the 3' UTRs of *MSL5* (**F-H**) and *PRO3* (**I-J**). Annotation and read numbers are displayed as in Fig. 2. Lariat RT-PCR, mRNA RT-PCR and Sanger sequencing confirmed the novel 5' splice sites and branch sites and are displayed as in Fig. 5. Note that a branch point (BP-2) in *MSL5* that was not identified by LIT-seq (**F**) was revealed by Sanger sequencing of the lariat RT-PCR products as shown in **H**. In **F**, conservation scores between seven yeasts is shown in green, as in Fig. 5E.

**Supplemental Note 1:**

The basis for the low number of uniquely mapped reads in this particular 3'(rDbr1+) library has not yet been determined. Note that despite the fewer uniquely mapped reads in the 3'(rDbr1+) library, the fraction of uniquely mapped reads that mapped to introns and splice sites was still high (Table S1), the fraction of introns detected was still high (Fig. 2), and the number of reads was sufficient to map branch sites (Fig. 3), to empirically define the branch site consensus sequence (Fig. 3), and to discover novel introns (Figs. 5, 6). Further, although the absolute numbers differed significantly, the number of 5' and 3' reads for a given intron correlated (Figure S2). Overall, this particular 3'(rDbr1+) library, although lower in depth than the 5'(rDbr1+) library, yielded findings qualitatively similar to the 5'(rDbr1+) library. In subsequent trials with RNase R treatment, the number of uniquely mapped reads was similar for the 3'(rDbr1+) and 5'(rDbr1+) libraries (Table S1).

**Supplemental Note 2:**

Note that the enrichment for intronic RNA by LIT-seq is much higher than 15-fold, because in our control libraries, we only omit rDbr1 treatment; all other enrichment features are maintained in the control libraries, including, for example, XRN-1 and CIP treatment.

**Supplemental Note 3:**

Note that in our control libraries, the 5' intronic reads mapped preferentially to the 5' splice site, and the 3' intronic reads mapped preferentially to the branch point (Figs. 3, S4E, G, I and S7E, F). Several reasons could account for the presence of these splice site reads in control libraries. First, these reads could result from Dbr1-independent debranching in the cell; indeed, the spliceosome can debranch lariats (Tseng and Cheng 2013). Alternatively, these reads could result from Dbr1-independent debranching in the test tube, either by chemical cleavage of the 2'-5' phosphodiester bond or by enzymatic cleavage of this bond via unknown contaminating debranching activities associated with the enzymes used (e.g. CIP). Lastly, these splice site reads could simply reflect a low level of cross-contamination between samples either during experimental preparation of the libraries or during barcode-mediated sorting of library reads after deep sequencing of the pooled libraries. Regardless of the reason underlying the splice site reads in the control libraries, the normalized splice site read levels were dramatically lower than in the debranching libraries.

**Supplemental Note 4**

As noted in the legend to Fig. 3, in (rDbr1-) control libraries we have recovered reads mapping to the 5’ and 3’ ends of potential stem loops residing in the introns of *RPL28* and *RPS17A* (Fig. 3B, E). Currently, the processing pathway that would yield these stem loops is unknown. The stem loops may simply reflect stable intermediates in the exonucleolytic degradation of these introns. Alternatively, these structures may be specifically targeted by endoribonucleases, such as Rnt1, an RNase III family member that targets for cleavage the double-stranded ends of particular stem loops, including some intronic stem loops (Danin-Kreiselman et al. 2003), although the stem-loops in *RPL28* and *RPS17A* lack the AGNN motif characteristic of Rnt1 substrates. Additionally, the 5’ ends may result from XRN-1 treatment *in vitro*. The 3’ ends lack oligo-A tails, so they are likely generated in the cytoplasm.

**Supplemental Note 5**

In addition to searching for novel splice sites that deviated from the consensus at two positions, we searched for novel splice sites that deviated from the consensus at three positions; however, by lariat RT-PCR we were unable to validate any additional, potential introns implicated by this approach (0 lariats confirmed out of 5 putative cases). These negative results could reflect an even lower abundance of lariats formed at such deviant splice sites that would render them undetectable by lariat RT-PCR, which is already inherently inefficient, given its requirement that RT traverse the branch site. Given the low discovery rate, we restricted our analysis to two mismatches.
